# Supplementary material
Source: Frontiers journal article supplement (https://www.frontiersin.org/articles/325019)
Supplement: Presentation_1.PDF [file Presentation_1.PDF]

---

# **Supplementary Material: Measuring Mindfulness: A Psychophysiological Approach**

**Vladimir Bostanov<sup>1</sup>, Lilian Ohlrogge<sup>2</sup>, Rita Britz<sup>2</sup>, Martin Hautzinger<sup>2</sup>, and  
Boris Kothoubey<sup>1,\*</sup>**

**\*Correspondence:**

Boris Kothoubey, Institute of Medical Psychology and Behavioral Neurobiology,  
University of Tübingen, Silcherstr. 5, D-72076 Tübingen, Germany  
boris.kotchoubey@uni-tuebingen.de

## **1 SUPPLEMENTARY DATA**

**The MP4 video** contains the written and spoken instructions (German) of the mood & rumination induction procedure.

**The ZIP archive** contains the following data:

- `BostanovEtAlMindfulness_Suppl_ADSdata.csv` – individual participants' weekly average depression symptom (DS) scores as measured by the Allgemeine Depressionsskala (ADS), the German version of the CES-D;
- `BostanovEtAlMindfulness_Suppl_AMPdata.csv` – individual participants' weekly average amount of mindfulness practice (AMP) scores;
- `BostanovEtAlMindfulness_Suppl_ADS_AMP.html` – individual participants' weekly average DS & AMP scores in HTML format for better viewing;
- `BostanovEtAlMindfulness_Suppl_ADSitemsData.csv` – individual participants' weekly scores for each ADS item;
- `BostanovEtAlMindfulness_Suppl_ADSitems.txt` – the German text of the ADS items;
- `BostanovEtAlMindfulness_Suppl_dERP_i.dDS.AMP.csv` – individual participants' values of: the pre-post-therapy changes (dERP<sub>i</sub>) in the event-related brain potentials (ERPs) recorded in the passive mindfulness meditation task; the average depression symptom scores during therapy (DSt), during follow-up (DSf), and the corresponding difference  $dDS = DSf - DSt$ ; the average amount of mindfulness practice during therapy (AMP<sub>t</sub>) and during follow-up (AMP<sub>f</sub>);
- `BostanovEtAlMindfulness_Suppl_qData.csv` – individual participants' scores on various questionnaires etc.;
- `BostanovEtAlMindfulness_Suppl_qData.html` – same as above dataset, but displayed in HTML format for better viewing and preceded by a legend explaining which is what.

## 2 SUPPLEMENTARY TABLES AND FIGURES

### 2.1 Tables

Table S1 shows results obtained from the *matched* samples. These are pre-post therapy differences in ERP measures and various questionnaire scores as well as long-term changes in trait measures of rumination and mindfulness.

| Measure            | ERP task | CT Group |                      |            |          |  | MBCT Group |                      |            |          |  | Both (CT + MBCT) |                      |            |          | Difference |                        |                      |
|--------------------|----------|----------|----------------------|------------|----------|--|------------|----------------------|------------|----------|--|------------------|----------------------|------------|----------|------------|------------------------|----------------------|
|                    |          | <i>N</i> | <i>M</i> ± <i>SD</i> | <i> t </i> | <i>p</i> |  | <i>N</i>   | <i>M</i> ± <i>SD</i> | <i> t </i> | <i>p</i> |  | <i>N</i>         | <i>M</i> ± <i>SD</i> | <i> t </i> | <i>p</i> | <i>M</i>   | <i> t<sub>d</sub> </i> | <i>p<sub>d</sub></i> |
| DSt                |          | 19       | 12.89 ± 5.8          |            |          |  | 41         | 11.27 ± 5.1          |            |          |  | 60               | 11.78 ± 5.4          |            |          | -1.62      | 1.1                    | 0.28                 |
| DSf                |          | 19       | 10.96 ± 6.4          |            |          |  | 41         | 10.58 ± 5.3          |            |          |  | 60               | 10.70 ± 5.6          |            |          | -0.39      | 0.2                    | 0.81                 |
| dDS                |          | 14       | -2.54 ± 4.0          | 2.3        | 0.04     |  | 14         | -0.94 ± 3.5          | 1.0        | 0.34     |  | 28               | -1.74 ± 3.8          | 2.4        | 0.02     | 1.59       | 1.1                    | 0.28                 |
| dERP <sub>i</sub>  | P        | 20       | 0.72 ± 0.5           |            |          |  | 20         | 0.47 ± 0.6           |            |          |  | 40               | 0.60 ± 0.6           |            |          | -0.25      | 1.4                    | 0.17                 |
| dERP <sub>i</sub>  | A        | 18       | 0.97 ± 0.7           |            |          |  | 18         | 0.91 ± 0.6           |            |          |  | 36               | 0.94 ± 0.6           |            |          | -0.06      | 0.3                    | 0.78                 |
| dLCNV              | P        | 20       | -2.05 ± 8.3          | 1.1        | 0.28     |  | 20         | 4.40 ± 11.1          | 1.8        | 0.04*    |  |                  |                      |            |          | 6.45       | 2.1                    | 0.02*                |
| dTMSd              | P        | 19       | -0.47 ± 5.4          | 0.4        | 0.70     |  | 19         | 2.58 ± 5.4           | 2.1        | 0.05     |  | 38               | 1.05 ± 5.5           | 1.2        | 0.25     | 3.05       | 1.7                    | 0.09                 |
| dTMSc              | P        | 19       | 0.26 ± 4.1           | 0.3        | 0.78     |  | 19         | 0.26 ± 5.2           | 0.2        | 0.83     |  | 38               | 0.26 ± 4.6           | 0.4        | 0.72     | 0.00       | 0.0                    | 1.00                 |
| dTMSd              | A        | 20       | 0.25 ± 7.6           | 0.1        | 0.88     |  | 20         | 0.90 ± 6.6           | 0.6        | 0.55     |  | 40               | 0.57 ± 7.0           | 0.5        | 0.61     | 0.65       | 0.3                    | 0.77                 |
| dTMSc              | A        | 20       | -0.15 ± 5.8          | 0.1        | 0.91     |  | 20         | 0.65 ± 6.2           | 0.5        | 0.65     |  | 40               | 0.25 ± 5.9           | 0.3        | 0.79     | 0.80       | 0.4                    | 0.67                 |
| dMR                | A        | 15       | 2.00 ± 10.3          | 0.8        | 0.46     |  | 15         | 4.53 ± 9.1           | 1.9        | 0.07     |  | 30               | 3.27 ± 9.6           | 1.9        | 0.07     | 2.53       | 0.7                    | 0.48                 |
| dPANAS             |          | 20       | 1.90 ± 8.1           | 1.0        | 0.31     |  | 20         | 1.20 ± 14.1          | 0.4        | 0.71     |  | 40               | 1.55 ± 11.3          | 0.9        | 0.39     | -0.70      | 0.2                    | 0.85                 |
| dRSQ <sub>sy</sub> |          | 14       | -5.21 ± 4.6          | 4.2        | 0*       |  | 14         | -2.57 ± 4.5          | 2.2        | 0.05     |  | 28               | -3.89 ± 4.7          | 4.4        | 0*       | 2.64       | 1.5                    | 0.14                 |
| dRSQ <sub>se</sub> |          | 14       | -4.43 ± 2.7          | 6.1        | 0*       |  | 14         | -1.57 ± 3.4          | 1.7        | 0.11     |  | 28               | -3.00 ± 3.4          | 4.7        | 0*       | 2.86       | 2.4                    | 0.02                 |
| dRSQ <sub>di</sub> |          | 14       | 3.86 ± 4.2           | 3.5        | 0.00     |  | 14         | 0.29 ± 3.8           | 0.3        | 0.78     |  | 28               | 2.07 ± 4.3           | 2.5        | 0.02     | -3.57      | 2.4                    | 0.03                 |
| dMAAS              |          | 14       | 5.36 ± 11.7          | 1.7        | 0.11     |  | 14         | 1.71 ± 8.8           | 0.7        | 0.48     |  | 28               | 3.54 ± 10.3          | 1.8        | 0.08     | -3.64      | 0.9                    | 0.36                 |

**Table S1.** Pre-post-therapy differences and long-term changes in the matched samples. Pre-post-therapy differences: dERP<sub>i</sub>, multivariate difference in individual ERPs; dLCNV, univariate amplitude differences in late CNV; dTMSd and dTMSc, changes in the *state* mindfulness sub-scores, TMS-decentering and TMS-curiosity, respectively; dMR, changes in the motor response in the active meditation task. dPANAS, changes in the sum of the decrease in positive affect and the increase in negative affect (dPA – dNA) after the mood & rumination induction reflecting the pre-post-therapy change in participants' reaction to the procedure. Long-term changes: dDS = DSf – DSt, where DSf is the mean DS score during follow-up and DSt is the mean DS score during therapy; dRSQ<sub>sy</sub>, dRSQ<sub>se</sub>, dRSQ<sub>di</sub>, and dMAAS, changes in symptom-focused rumination, self-focused rumination, distraction, and *trait* mindfulness, respectively), over a period of more than 60 weeks, from the beginning of therapy till the end of the one-year follow-up. The passive meditation ERP task is denoted by "P", the active one by "A". *N* is the number of participants in the corresponding sample; *M* is the mean value of the corresponding difference measure; *SD* is the standard deviation; and *t* and *p* are the results of Students' *t*-tests checking whether the mean is different from zero; *|t<sub>d</sub>|* and *p<sub>d</sub>* Students' *t*-tests checking whether the mean in the CT group is different from the mean in the MBCT group. The *p*-values are *not* corrected for multiple comparisons; 0\* denotes *p* < 0.0005, i.e., *p*-values that remain significant after Bonferroni correction for 2 × 14 = 28 comparisons; 0.02\* is the significant *p*-value resulting from the planned *one-sided* *t*-test of the difference between dLCNV in the CT group and dLCNV in the MBCT group.

### 2.2 Figures

Grand average ERPs obtained in the *active* mindfulness meditation task are displayed in Figures S1 and S2.

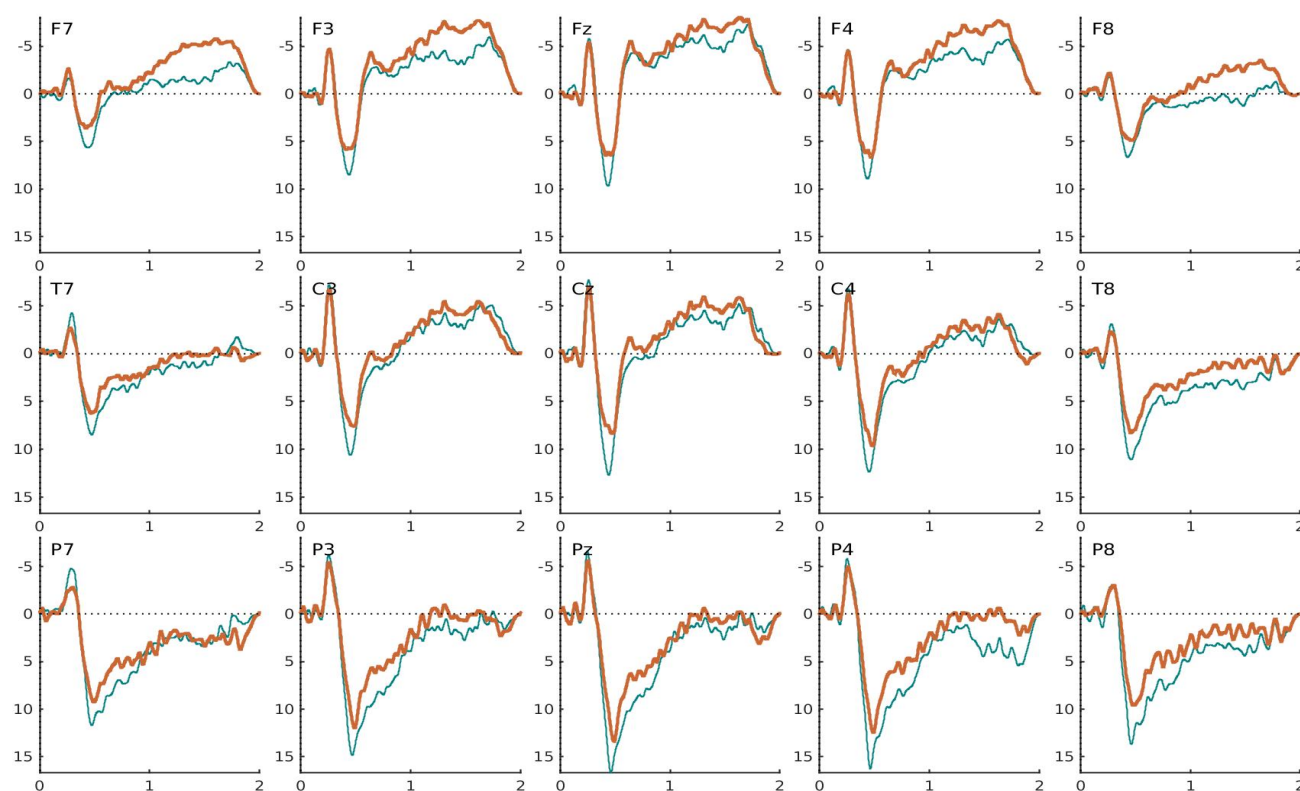

(a) ERPs obtained from the CT group before (thin green line) and after (thick brown line) 8 weeks of therapy.

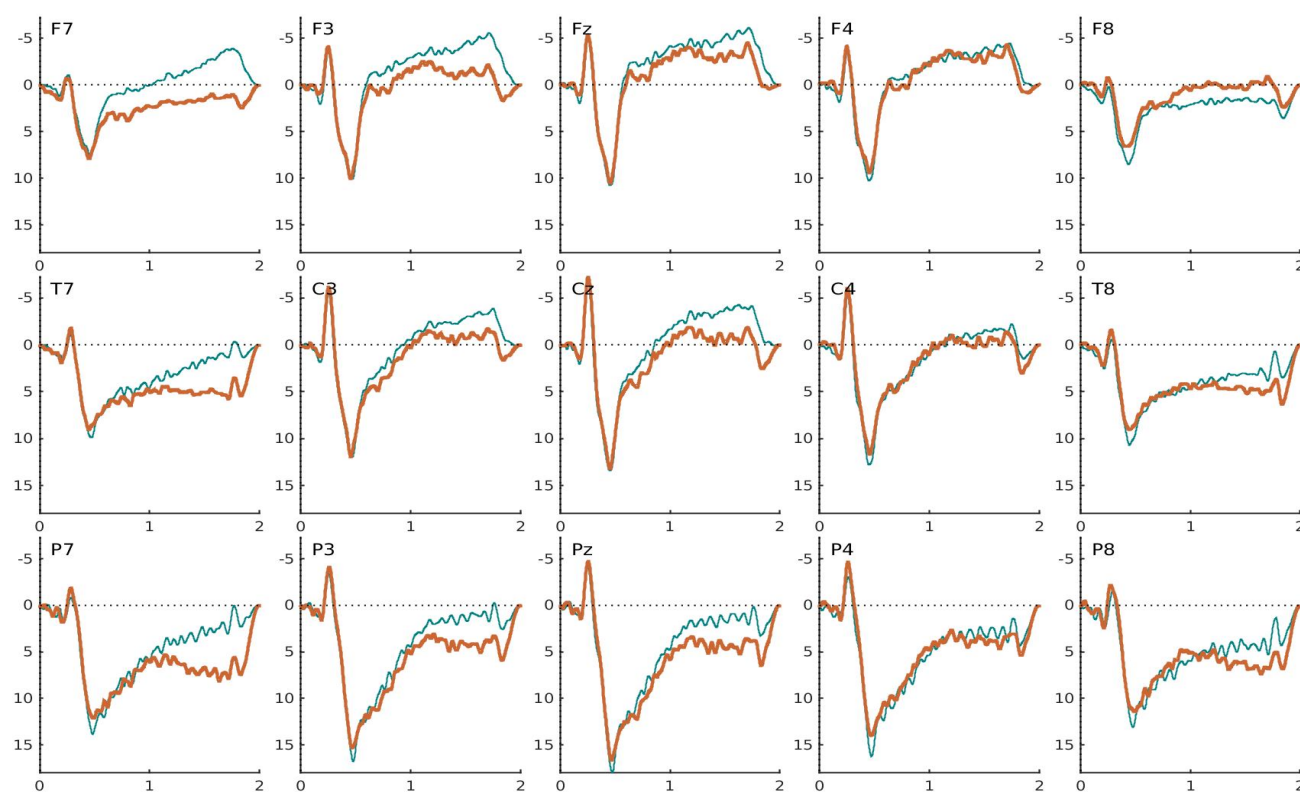

(b) ERPs obtained from the MBCT group before (thin green line) and after (thick brown line) 8 weeks of training.

Figure S1: Grand average ERPs obtained in the active mindfulness meditation task.

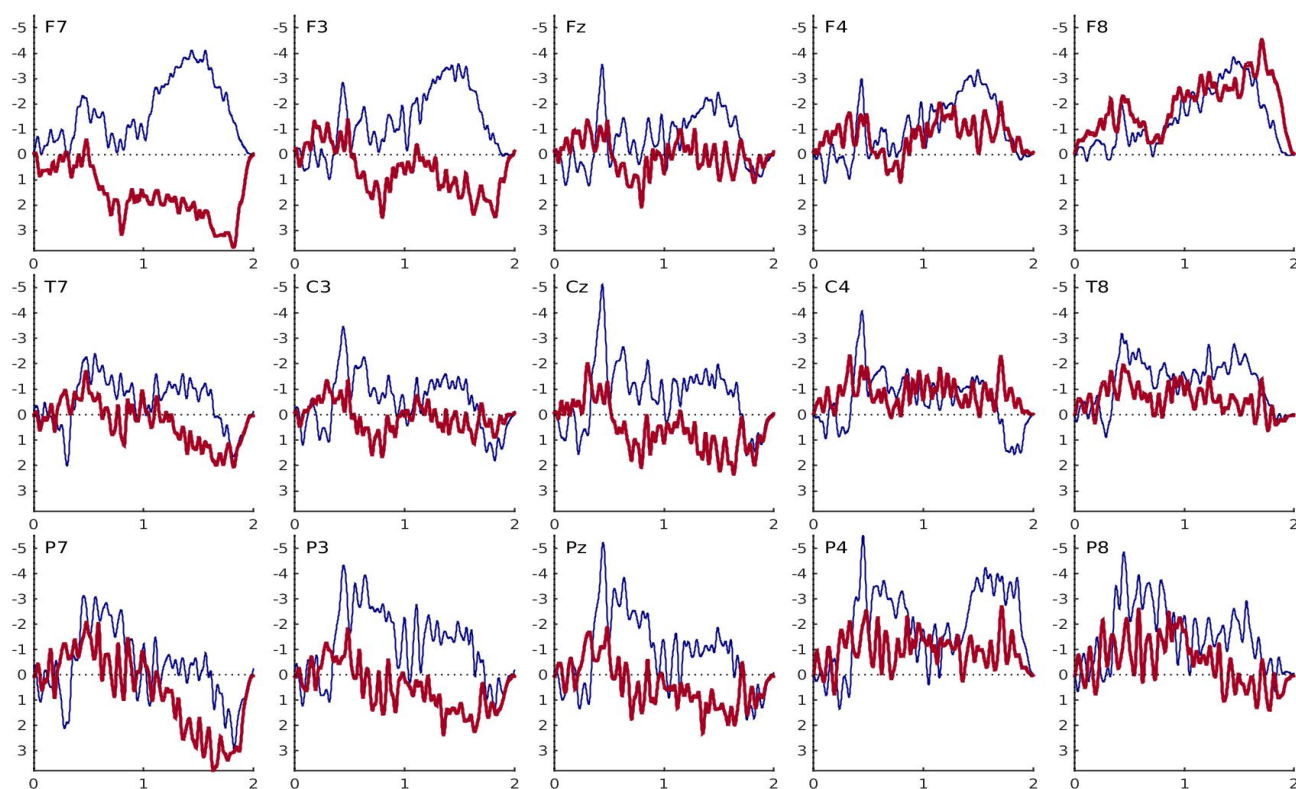

(a) Pre-post-therapy difference ERP in the CT group (thin blue line) and in the MBCT group (thick red line).

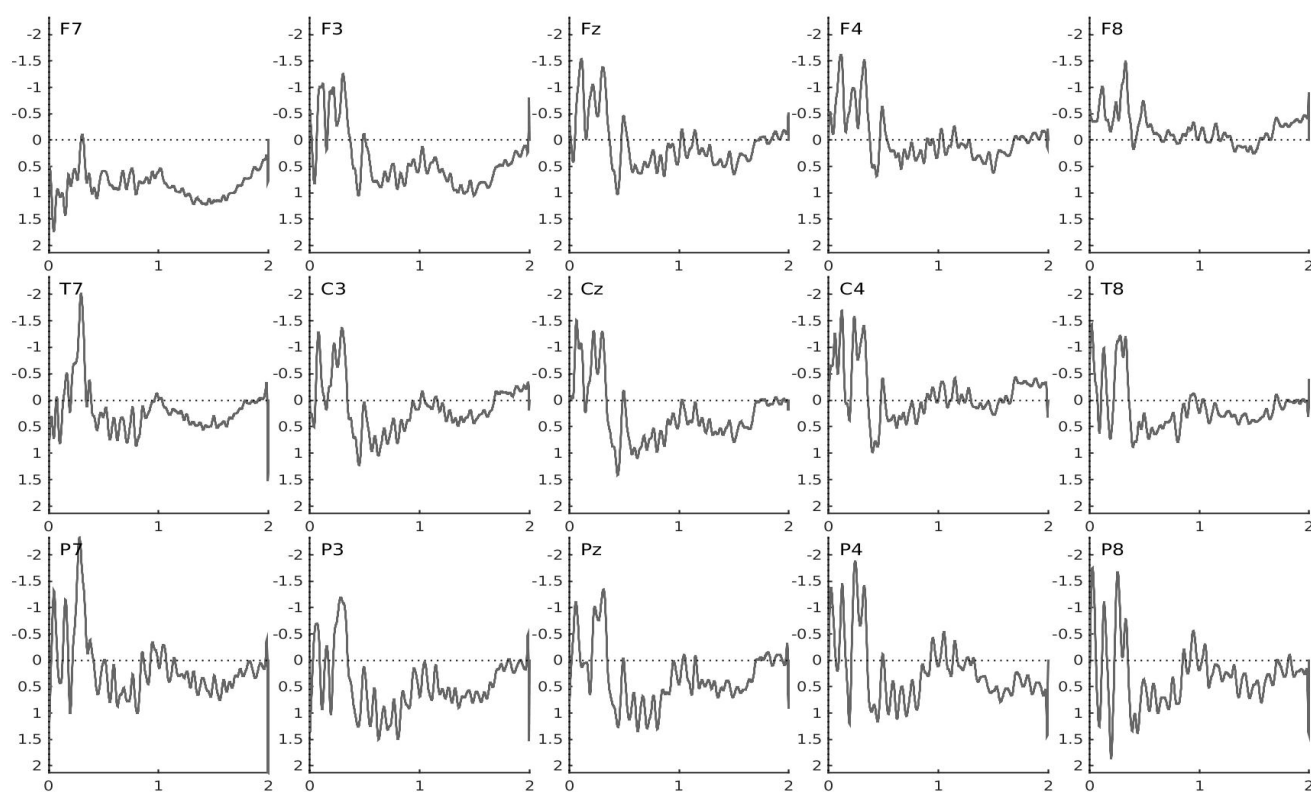

(b) Student's t-test of the difference between the ERP change in the CT group and the that in the MBCT group.

Figure S2: Pre-post-therapy change in the ERPs obtained in the active mindfulness meditation task.
